# Supplementary figures and images for: CEG 2.0: an updated database of clusters of essential genes including eukaryotic organisms
Source: Oxford University Press journal article supplement (doi:10.1093/database/baaa112), 2020-01-01

Distribution of cluster numbers with specific cluster size between CEG1.0 (in red) and CEG2.0 (in blue)

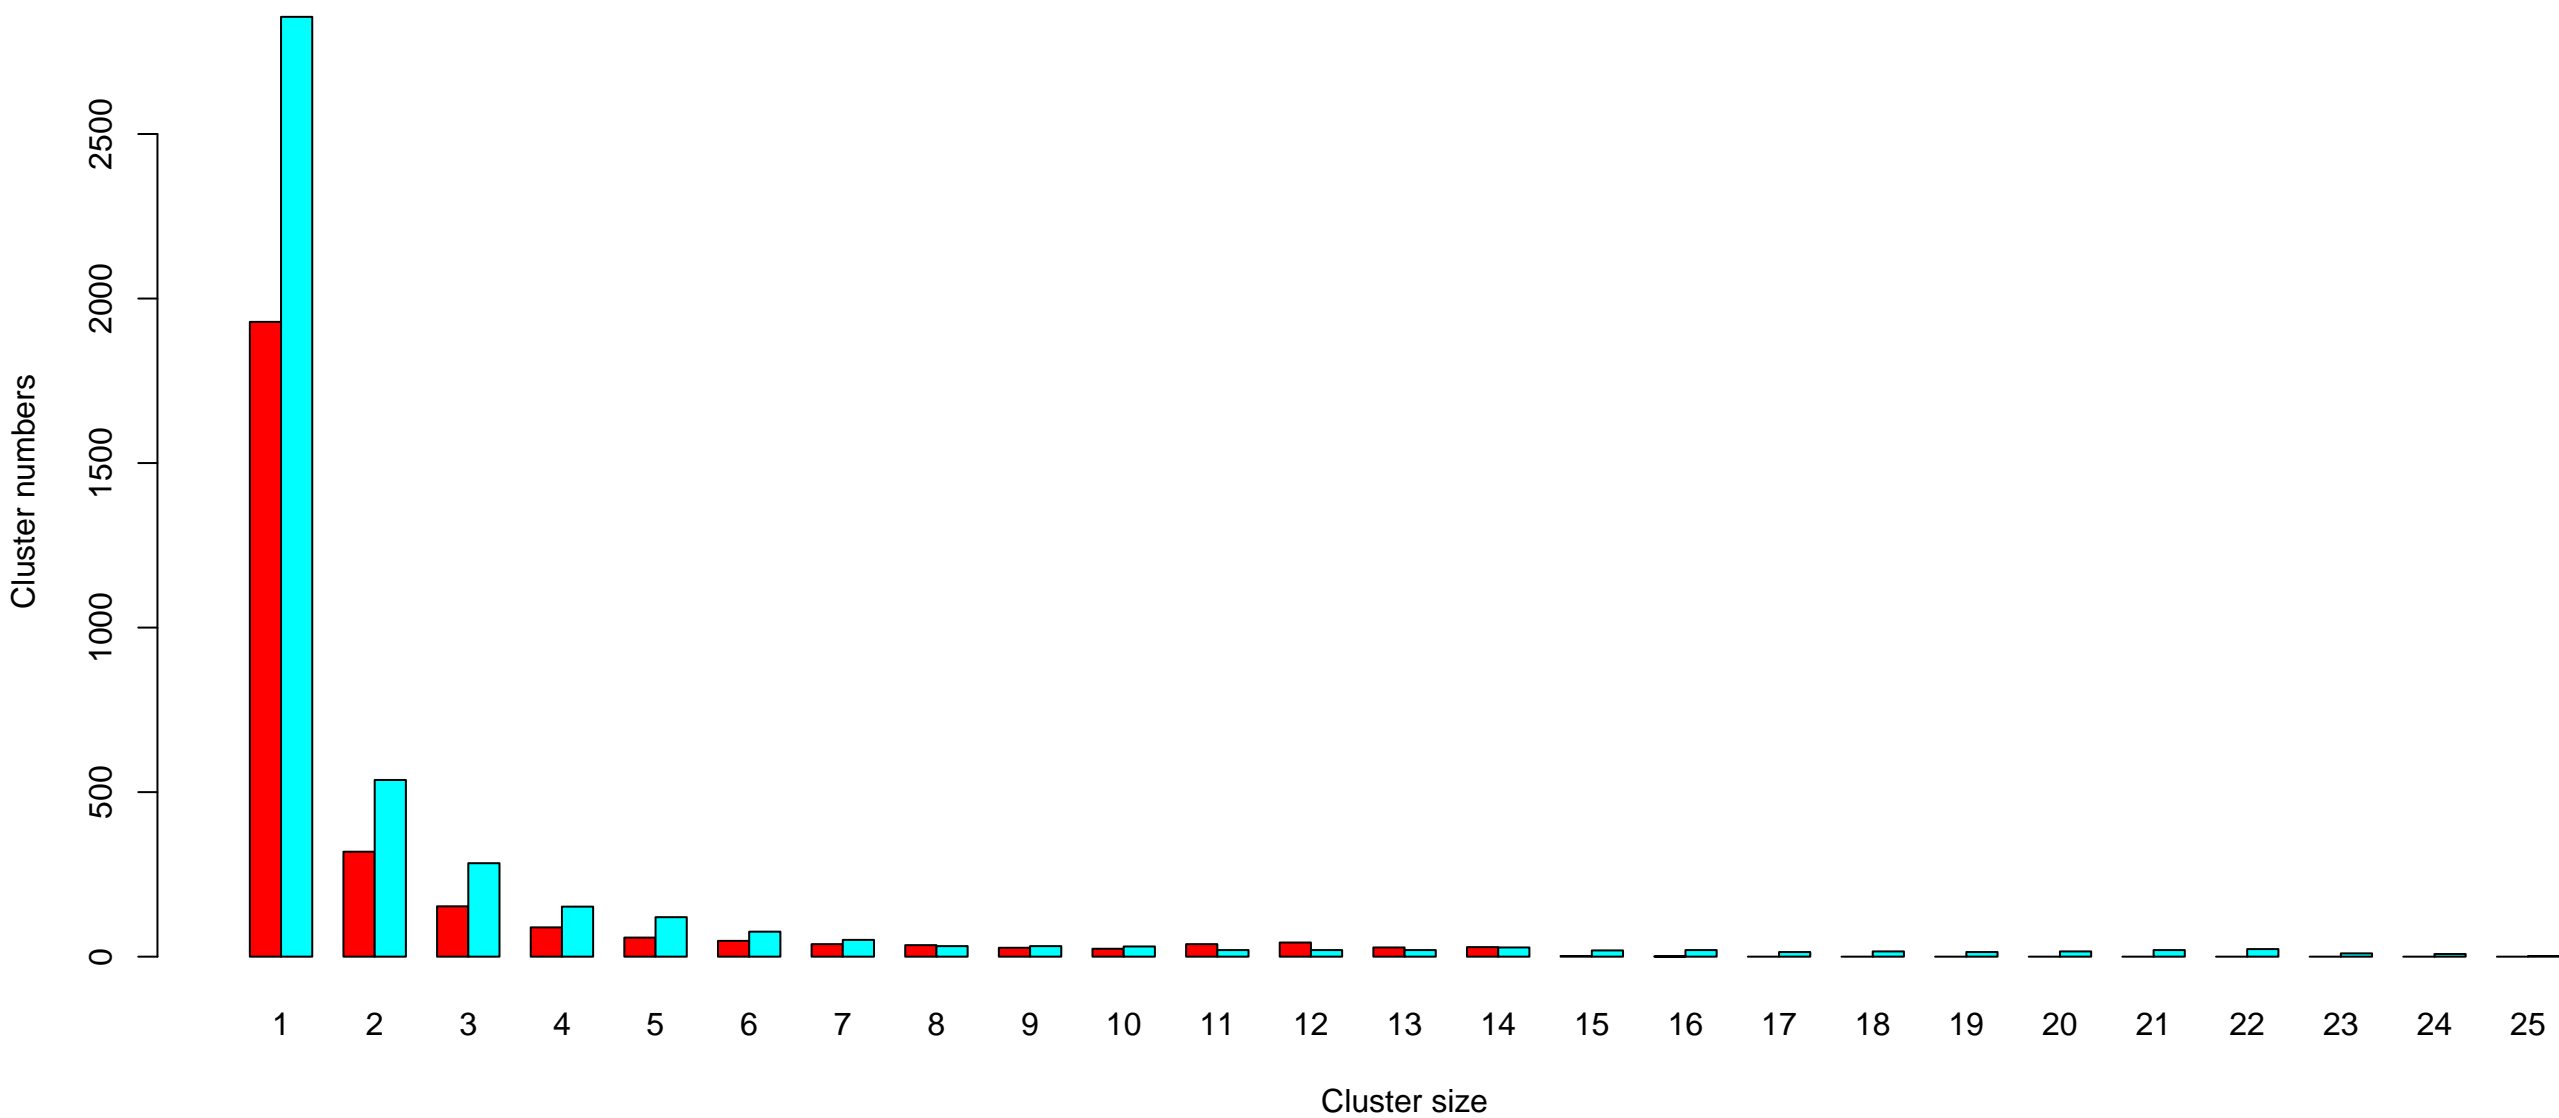

Supplement: baaa112_supp.zip [file baaa112_supp.zip]
